# Supplementary material
Source: PubMed Central journal article supplement (PMC10192123)
Supplement: NIHMS1886837-supplement-1.pdf [file NIHMS1886837-supplement-1.pdf]

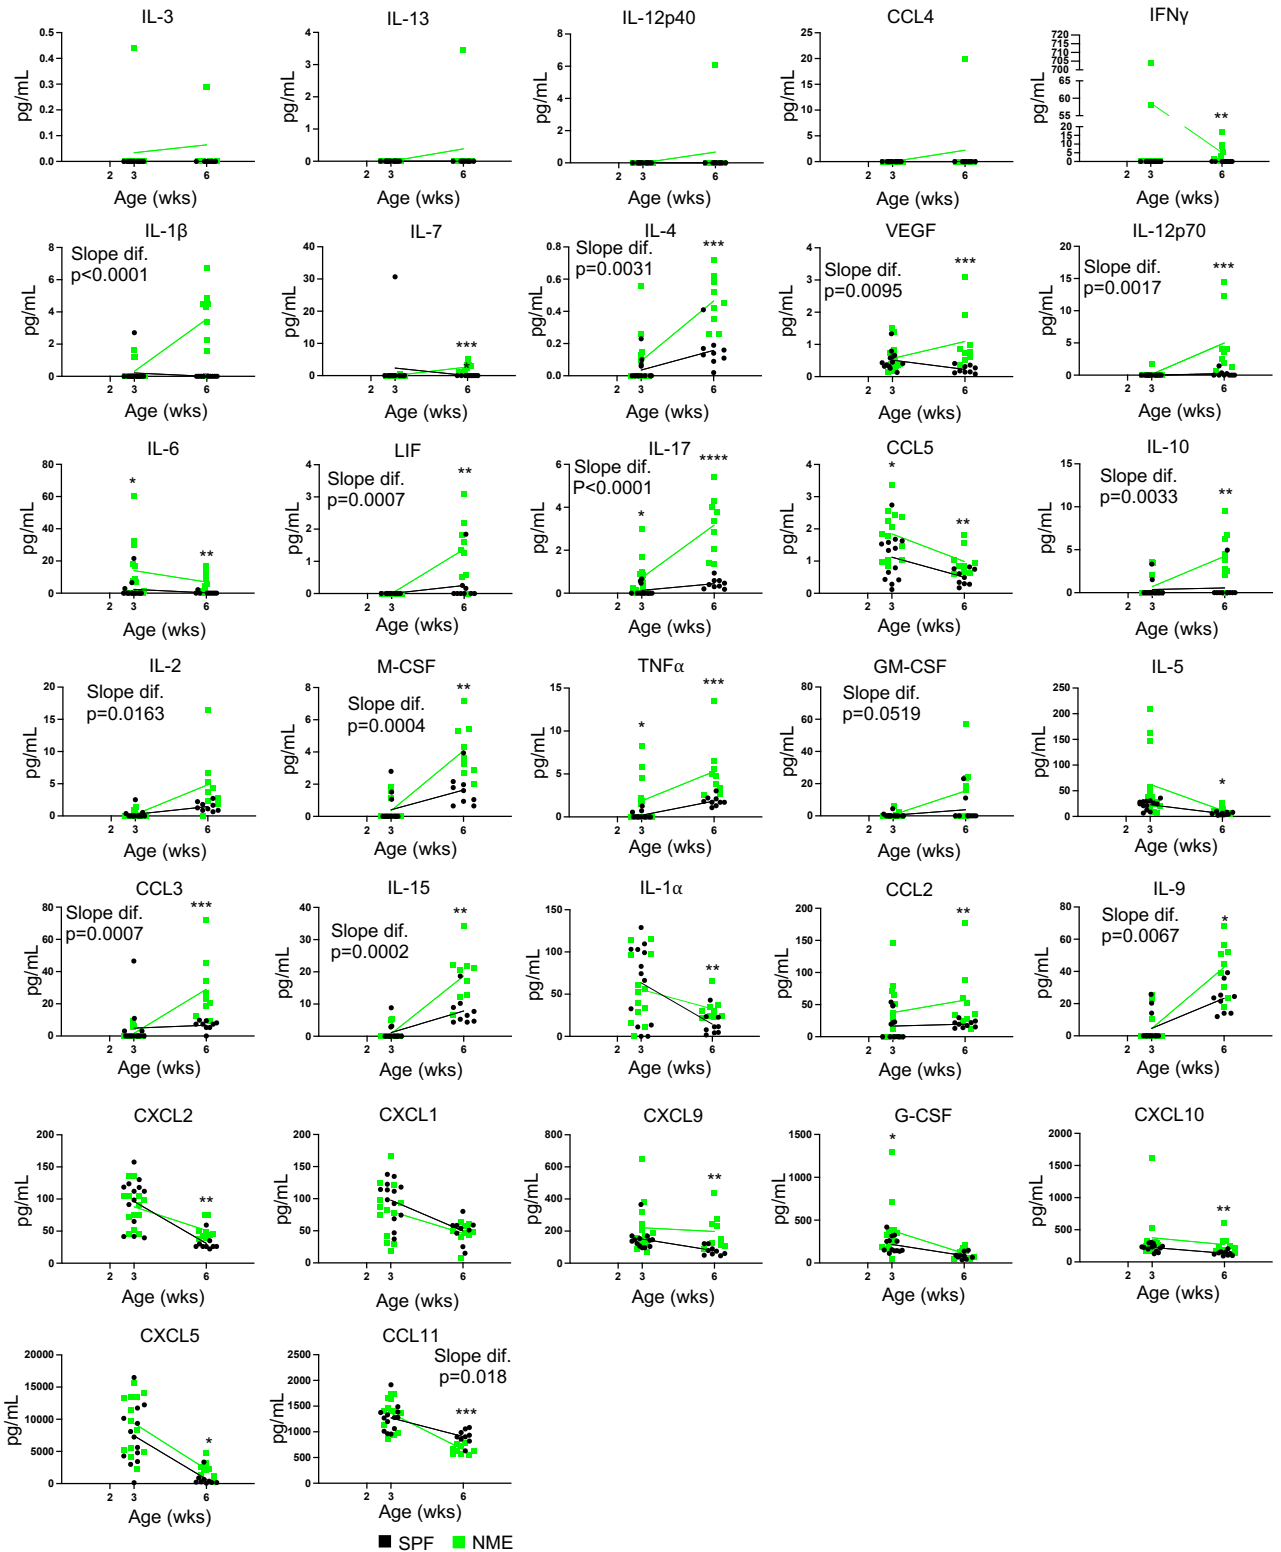

**Supplemental Figure 1:** Individual plasma cytokine/chemokine levels in SPF (black) and NME (green) mice at 3 and 6 wks of age. Data depicts the average of 13 mice and two experimental replicates. The p-values of significantly different slope are indicated on the graphs. \* $p \leq 0.05$ , \*\* $p \leq 0.01$ , \*\*\* $p \leq 0.001$ , \*\*\*\* $p \leq 0.0001$ .
